# Supplementary material for: Characteristics and sexual health service use of MSM engaging in chemsex: results from a large online survey in England
Source: HighWire-hosted journal article supplement (doi:10.1136/sextrans-2019-054345), 2020-03-05
Supplement: sextrans-2019-054345supp001_data_supplement.pdf [file sextrans-2019-054345supp001_data_supplement.pdf]

## Characteristics and sexual health service use of MSM engaging in chemsex: results from a large online survey in England - Supplementary material

Figure 1: Flow chart of survey recruitment from sexual health clinics (left) and apps (right)

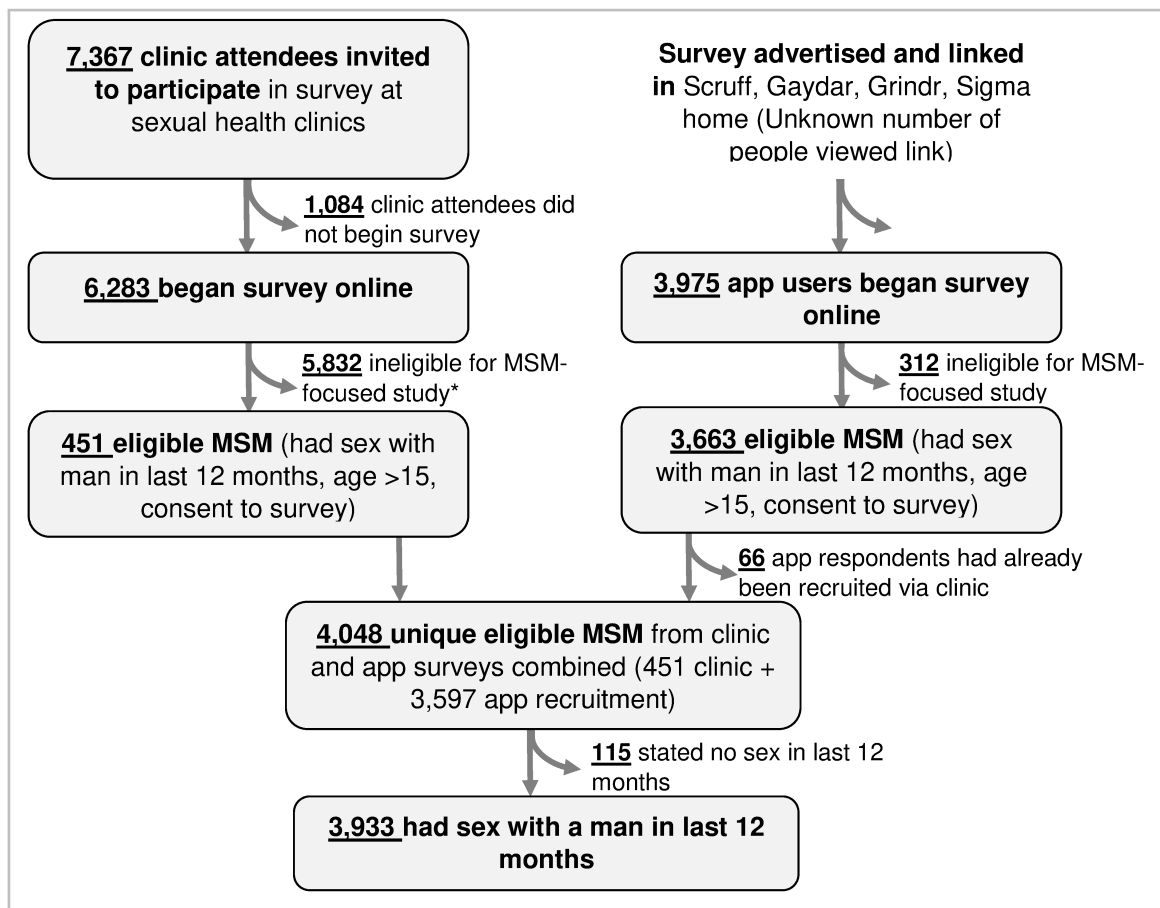

\*Note that the low proportion of eligible SHC-recruited respondents reflects that women and heterosexual men were also invited to the overall RiiSH study, however they were routed to a different questionnaire for heterosexual respondents which is not relevant to this paper.

**Table 1: Comparison of demographic characteristics among respondents to the RiiSH survey recruited from sexual health clinics and from social networking/dating apps in England (2016-2017).** Non-missing percentages presented.

|                                        | Number           |               |       | Non-missing percentage |               |        | Chi2 p value |
|----------------------------------------|------------------|---------------|-------|------------------------|---------------|--------|--------------|
|                                        | Clinic recruited | App recruited | Total | Clinic recruited       | App recruited | Total  |              |
| <b>Age group</b>                       |                  |               |       |                        |               |        |              |
| 16-29                                  | 181              | 638           | 819   | 43.0%                  | 18.2%         | 20.8%  | <0.001       |
| 30-44                                  | 163              | 1,090         | 1,253 | 38.7%                  | 31.0%         | 31.9%  |              |
| 45-59                                  | 66               | 1,349         | 1,415 | 15.7%                  | 38.4%         | 36.0%  |              |
| 60+                                    | 11               | 435           | 446   | 2.6%                   | 12.4%         | 11.3%  |              |
| <b>Ethnicity*</b>                      |                  |               |       |                        |               |        |              |
| White British/Irish                    | 267              | 2,856         | 3,123 | 64.0%                  | 82.2%         | 80.2%  | <0.001       |
| White other                            | 55               | 333           | 388   | 13.2%                  | 9.6%          | 10.0%  |              |
| Black                                  | 30               | 54            | 84    | 7.2%                   | 1.6%          | 2.2%   |              |
| Asian                                  | 31               | 127           | 158   | 7.4%                   | 3.7%          | 4.1%   |              |
| Mixed ethnicity                        | 23               | 77            | 100   | 5.5%                   | 2.2%          | 2.6%   |              |
| Other                                  | 11               | 28            | 39    | 2.6%                   | 0.8%          | 1.0%   |              |
| <b>Country of birth*</b>               |                  |               |       |                        |               |        |              |
| Not UK                                 | 134              | 583           | 717   | 31.9%                  | 16.9%         | 18.5%  | <0.001       |
| UK                                     | 286              | 2,876         | 3,162 | 68.1%                  | 83.1%         | 81.5%  |              |
| <b>Highest qualification received*</b> |                  |               |       |                        |               |        |              |
| Below degree                           | 153              | 1,693         | 1,846 | 36.4%                  | 49.2%         | 47.8%  | <0.001       |
| Uni degree or higher                   | 267              | 1,745         | 2,012 | 63.6%                  | 50.8%         | 52.2%  |              |
| <b>HIV status*</b>                     |                  |               |       |                        |               |        |              |
| HIV-negative/untested                  | 321              | 3,037         | 3,358 | 76.8%                  | 86.8%         | 85.8%  | <0.001       |
| HIV-positive                           | 97               | 460           | 557   | 23.2%                  | 13.2%         | 14.2%  |              |
| <b>Sex app</b>                         |                  |               |       |                        |               |        |              |
| Grindr                                 | -                | 1,894         | 1,894 | -                      | 53.9%         | 48.2%  | -            |
| Gaydar                                 | -                | 1,527         | 1,527 | -                      | 43.5%         | 38.8%  |              |
| Scruff                                 | -                | 67            | 67    | -                      | 1.9%          | 1.7%   |              |
| Sigma website                          | -                | 20            | 20    | -                      | 0.6%          | 0.5%   |              |
| <b>Total</b>                           | 421              | 3,512         | 3,993 | 100.0%                 | 100.0%        | 100.0% |              |

\* Variables have <2.5% missing data with no difference by recruitment method

**Table 2: Univariable logistic regression analysis results on association between highest qualification received and chemsex in the 12 months prior to completing RiiSH MSM survey (2016-2017), stratified by continent of birth (simplified to UK vs non-UK; Non-missing percentages presented)**

|                         | No chemsex in past 12 months |       | Chemsex in past 12 months |       | Univariable logistic regression |                         |                |
|-------------------------|------------------------------|-------|---------------------------|-------|---------------------------------|-------------------------|----------------|
|                         | n                            | %     | n                         | %     | Odds ratio                      | 95% confidence interval | Global p value |
| <b>All</b>              |                              |       |                           |       |                                 |                         |                |
| Not university educated | 1683                         | 48.7% | 159                       | 40.5% | 1.40                            | 1.13-1.73               | 0.002          |
| University educated     | 1771                         | 51.3% | 234                       | 59.5% |                                 |                         |                |
| <b>Born outside UK</b>  |                              |       |                           |       |                                 |                         |                |
| Not university educated | 164                          | 28.3% | 26                        | 24.1% | 1.24                            | 0.77-2.00               | 0.371          |
| University educated     | 416                          | 71.7% | 82                        | 75.9% |                                 |                         |                |
| <b>Born in UK</b>       |                              |       |                           |       |                                 |                         |                |
| Not university educated | 1500                         | 53.1% | 132                       | 47.0% |                                 |                         |                |
| University educated     | 1326                         | 46.9% | 149                       | 53.0% | 1.27                            | 0.99-1.63               | 0.510          |

**Table 3. History of condomless anal sex (CAS) and HIV status of partner(s) in 3 months prior to completing RiiSH MSM survey (2016-2017), by HIV status and chemsex participation in the past 12 months. Non-missing percentages presented**

|                                    | No chemsex in past 12 months |       | Chemsex in past 12 months |       |
|------------------------------------|------------------------------|-------|---------------------------|-------|
|                                    | n                            | %     | n                         | %     |
| <b>HIV-positive*</b>               |                              |       |                           |       |
| No CAS                             | 164                          | 43.7% | 24                        | 20.5% |
| All partners seroconcordant        | 68                           | 18.1% | 52                        | 44.4% |
| >1 serodiscordant partner          | 87                           | 23.2% | 29                        | 24.8% |
| >1 partner with unknown HIV status | 56                           | 14.9% | 12                        | 10.3% |
| <b>HIV-negative/unknown*</b>       |                              |       |                           |       |
| No CAS                             | 1586                         | 58.1% | 70                        | 30.0% |
| All partners seroconcordant        | 747                          | 27.4% | 72                        | 30.9% |
| >1 serodiscordant partner          | 180                          | 6.6%  | 42                        | 18.0% |
| >1 partner with unknown HIV status | 218                          | 8.0%  | 49                        | 21.0% |

\*Missingness similar across all groups: HIV-positive reporting no chemsex: 11.3%; HIV-positive reporting chemsex: 12.0%, HIV-negative/unknown reporting chemsex: 10.4%; HIV-negative/untested reporting no chemsex: 11.6%. No identified demographic differences between persons who did and did not respond.
